# Supplementary material for: Prevalence of Gender-Affirming Surgical Procedures Among Minors and Adults in the US
Source: PubMed Central journal article supplement (PMC11211955; doi:10.1001/jamanetworkopen.2024.18814), 2024-06-27
Supplement: jamanetwopen-e2418814-s001.pdf [file jamanetwopen-e2418814-s001.pdf]

## Supplemental Online Content

Dai D, Charlton BM, Boskey ER, et al. Prevalence of gender-affirming surgeries among minors and adults in the US. *JAMA Netw Open*. 2024;7(6):e2418814.  
doi:10.1001/jamanetworkopen.2024.18814

### **eMethods.**

**eTable.** Results of quality assessment per study

This supplemental material has been provided by the authors to give readers additional information about their work.

## eMethods.

### *Data:*

This study used 2019 data from Inovalon Insight's Real-World Data (RWD), which captures administrative insurance claims of people in Medicaid managed care organizations, Medicare Advantage, and commercial insurance across all 50 states. Patients' race and ethnicity was missing for the majority of people and was not included in this study. The study sample was limited to people with active insurance enrollment in 2019 who had at least one insurance-covered medical claim within the year.

### *Identifying gender-affirming procedures among Transgender and Gender Diverse (TGD) people*

Gender-affirming procedures were defined using lists of procedures—using International Classification of Diseases Tenth Revision (ICD-10) procedure codes or Current Procedural Terminology (CPT) codes—from multiple sources including Blue Cross Blue Shield's "Gender Affirming Services", the Centers of Medicare and Medicaid Services "Gender Reassignment Services for Gender Dysphoria", Aetna's "Gender Affirming Surgery", and a previously validated list from Hughto and colleagues.<sup>1-4</sup> (eTable1). To identify TGD people, we used a list of TGD-related ICD-10 diagnoses codes from prior studies and insurance coverage specifications.<sup>1-3,5,6</sup> (eTable2)

Of note, clinical guidelines and insurance companies generally require that TGD people have a TGD-related diagnosis prior to initiating gender-affirming procedures.<sup>7</sup> Thus, we identified gender-affirming procedures on TGD people as a gender-affirming surgery on a patient who had TGD-related diagnosis within 6 months of the surgery. We then retained only surgeries where patients had no other medical indications which could clinically justify the type of procedure done within 6 months of the surgery (exclusionary diagnoses for each procedure-type can found below in eTable 3). eTable 4 contains a list of diagnoses which, if present within 6 months of a patient's surgery, resulted in manual review of patient history by clinical experts to determine if the surgery could definitively be deemed gender-affirming. Lastly, we excluded all surgeries done on intersex individuals to align with proposed legislative regulations which explicitly do not restrict procedures on intersex minors.<sup>8</sup> (eTable 5) It should be noted that these legislative allowances for surgeries on intersex minors stands contrary to growing international human rights agreements which prohibit non-consensual medical procedures on young intersex people.<sup>9</sup> After these steps, we calculate the annual rate at which people underwent gender-affirming surgeries with a TGD-related diagnosis per 100,000 overall people within specific age categories. Additionally, we report the proportion of gender-affirming surgeries among TGD people that were chest-related procedures.

We also determined the number of breast reductions which occurred annually across TGD people and cisgender males. We first identified all breast reduction surgeries (CPT codes 19318, 19300). If the patient had a TGD-related diagnosis within 6 months of the surgery, they were considered TGD; those without a TGD-related diagnosis within 6 months of the surgery and a male sex marker were considered cisgender males. Again, we excluded intersex individuals, as well as any patients with other medical indications for a chest-related procedure within 6 months

of the surgery (see “Chest” procedure-type exclusionary diagnoses in eTable 3). We then determined the proportion of breast reductions performed on cisgender males and TGD people.

**eTable.** Gender Affirming Procedure Codes by Procedure Type

| Procedure Type     | Code Type | Code    | Description                                                                                                                           |
|--------------------|-----------|---------|---------------------------------------------------------------------------------------------------------------------------------------|
| No Exclusionary Dx | ICD-10    | 0W4M070 | Creation of Vagina in Male Perineum with Autologous Tissue Substitute, Open Approach.                                                 |
| No Exclusionary Dx | ICD-10    | 0W4M0J0 | Creation of Vagina in Male Perineum with Synthetic Substitute, Open Approach                                                          |
| No Exclusionary Dx | ICD-10    | 0W4M0K0 | Creation of Vagina in Male Perineum with Non-autologous Tissue Substitute, Open Approach                                              |
| No Exclusionary Dx | ICD-10    | 0W4M0Z0 | Creation of Vagina in Male Perineum, Open Approach                                                                                    |
| No Exclusionary Dx | ICD-10    | 0W4N071 | Creation of Penis in Female Perineum with Autologous Tissue Substitute, Open Approach                                                 |
| No Exclusionary Dx | ICD-10    | 0W4N0J1 | Creation of Penis in Female Perineum with Synthetic Substitute, Open Approach                                                         |
| No Exclusionary Dx | ICD-10    | 0W4N0K1 | Creation of Penis in Female Perineum with Non-autologous Tissue Substitute, Open Approach                                             |
| No Exclusionary Dx | ICD-10    | 0W4N0Z1 | Creation of Penis in Female Perineum, Open Approach                                                                                   |
| No Exclusionary Dx | CPT       | 56805   | Clitoroplasty for intersex state                                                                                                      |
| No Exclusionary Dx | CPT       | 57291   | Construction of artificial vagina; without graft                                                                                      |
| No Exclusionary Dx | CPT       | 57292   | Construction of artificial vagina; with graft                                                                                         |
| No Exclusionary Dx | CPT       | 57335   | Vaginoplasty for intersex state                                                                                                       |
| No Exclusionary Dx | CPT       | 55175   | Scrotoplasty; simple                                                                                                                  |
| No Exclusionary Dx | CPT       | 55180   | Scrotoplasty; Complicated                                                                                                             |
| No Exclusionary Dx | CPT       | 55970   | Intersex surgery; male to female                                                                                                      |
| No Exclusionary Dx | CPT       | 55980   | Intersex surgery-Female to Male                                                                                                       |
| Reproductive Organ | CPT       | 58661   | Laparoscopic Procedures on the Oviduct/Ovary                                                                                          |
| Reproductive Organ | CPT       | 53430   | Urethroplasty (reconstruction of female urethra)                                                                                      |
| Reproductive Organ | CPT       | 53420   | Urethroplasty, 2-stage reconstruction or repair of prostatic or membranous urethra; first stage                                       |
| Reproductive Organ | CPT       | 53425   | Urethroplasty, 2-stage reconstruction or repair of prostatic or membranous urethra; second stage                                      |
| Reproductive Organ | CPT       | 58152   | Total abdominal hysterectomy (corpus and cervix), with or without removal of tube(s), with or without removal of ovary(s);            |
| Reproductive Organ | CPT       | 58150   | Total abdominal hysterectomy (corpus and cervix), with or without removal of tube(s), with or without removal of ovary(s);            |
| Reproductive Organ | CPT       | 58180   | Supracervical abdominal hysterectomy (subtotal hysterectomy), with or without removal of tube(s), with or without removal of ovary(s) |
| Reproductive Organ | CPT       | 58260   | Vaginal hysterectomy, for uterus 250 g or less;                                                                                       |
| Reproductive Organ | CPT       | 58262   | Vaginal hysterectomy, for uterus 250 g or less; with removal of tube(s), and/or ovary(s)                                              |
| Reproductive Organ | CPT       | 58263   | Vaginal hysterectomy, for uterus 250 g or less; with removal of tube(s), and/or ovary(s); and repair of enterocele                    |
| Reproductive Organ | CPT       | 58267   | Vaginal hysterectomy, for uterus 250 g or less;                                                                                       |
| Reproductive Organ | CPT       | 58270   | Vaginal hysterectomy, for uterus 250 g or less; with repair of enterocele                                                             |
| Reproductive Organ | CPT       | 58275   | Vaginal hysterectomy, with total or partial vaginectomy;                                                                              |
| Reproductive Organ | CPT       | 58280   | Vaginal hysterectomy, with total or partial vaginectomy; and repair of enterocele                                                     |
| Reproductive Organ | CPT       | 58290   | Vaginal hysterectomy, for uterus greater than 250 g;                                                                                  |

|                    |        |         |                                                                                                                                   |
|--------------------|--------|---------|-----------------------------------------------------------------------------------------------------------------------------------|
| Reproductive Organ | CPT    | 58291   | Vaginal hysterectomy, for uterus greater than 250 g; with removal of tube(s) and/or ovary(s)                                      |
| Reproductive Organ | CPT    | 58292   | Vaginal hysterectomy, for uterus greater than 250 g; with removal of tube(s) and/or ovary(s); and repair of enterocele            |
| Reproductive Organ | CPT    | 58294   | Vaginal hysterectomy, for uterus greater than 250 g; and repair of enterocele                                                     |
| Reproductive Organ | CPT    | 58541   | Laparoscopy, surgical, supracervical hysterectomy, for uterus 250 g or less;                                                      |
| Reproductive Organ | CPT    | 58542   | Laparoscopy, surgical, supracervical hysterectomy, for uterus 250 g or less; with removal of tube(s) and/or ovary(s)              |
| Reproductive Organ | CPT    | 58543   | Laparoscopy, surgical, supracervical hysterectomy, for uterus greater than 250 g;                                                 |
| Reproductive Organ | CPT    | 58544   | Laparoscopy, surgical, supracervical hysterectomy, for uterus greater than 250 g; with removal of tube(s) and/or ovary(s)         |
| Reproductive Organ | CPT    | 58550   | Laparoscopy, surgical, with vaginal hysterectomy, for uterus 250 g or less;                                                       |
| Reproductive Organ | CPT    | 58552   | Laparoscopy, surgical, with vaginal hysterectomy, for uterus 250 g or less; with removal of tube(s) and/or ovary(s)               |
| Reproductive Organ | CPT    | 58553   | Laparoscopy, surgical, with vaginal hysterectomy, for uterus greater than 250 g;                                                  |
| Reproductive Organ | CPT    | 58554   | Laparoscopy, surgical, with vaginal hysterectomy, for uterus greater than 250 g; with removal of tube(s) and/or ovary(s)          |
| Reproductive Organ | CPT    | 58570   | Laparoscopy, surgical, with total hysterectomy, for uterus 250 g or less;                                                         |
| Reproductive Organ | CPT    | 58571   | Laparoscopy, surgical, with total hysterectomy, for uterus 250 g or less; with removal of tube(s) and/or ovary(s)                 |
| Reproductive Organ | CPT    | 58572   | Laparoscopy, surgical, with total hysterectomy, for uterus greater than 250 g;                                                    |
| Reproductive Organ | CPT    | 58573   | Laparoscopy, surgical, with total hysterectomy, for uterus greater than 250 g; with removal of tube(s) and/or ovary(s)            |
| Reproductive Organ | CPT    | 57111   | Vaginectomy; with removal of paravaginal tissue (radical vaginectomy)                                                             |
| Reproductive Organ | CPT    | 57110   | Vaginectomy, complete removal of vaginal wall                                                                                     |
| Reproductive Organ | CPT    | 57106   | Vaginectomy, partial removal of vaginal wall                                                                                      |
| Reproductive Organ | CPT    | 56620   | Vulvectomy; simple                                                                                                                |
| Reproductive Organ | CPT    | 56625   | Vulvectomy simple; complete                                                                                                       |
| Reproductive Organ | CPT    | 15750   | Neurovascular pedicle flap for metoidioplasty with clitoral transposition; other procedures utilize flaps and or free skin grafts |
| Reproductive Organ | CPT    | 56800   | Plastic repair of introitus                                                                                                       |
| Reproductive Organ | CPT    | 56810   | Perineoplasty, repair of perineum, non-obstetrical                                                                                |
| Reproductive Organ | CPT    | 58720   | Salpingo-oophorectomy, complete or partial, unilateral or bilateral (separate procedure)                                          |
| Reproductive Organ | CPT    | 58940   | Oophorectomy, complete or partial, unilateral or bilateral (separate procedure)                                                   |
| Reproductive Organ | ICD-10 | 0UTG0ZZ | Resection of vagina, open approach                                                                                                |
| Reproductive Organ | ICD-10 | 0UTG4ZZ | Resection of vagina, percutaneous endoscopic approach                                                                             |
| Reproductive Organ | ICD-10 | 0UTG7ZZ | Resection of vagina, via natural or artificial opening                                                                            |
| Reproductive Organ | ICD-10 | 0UTG8ZZ | Resection of vagina, via natural or artificial opening endoscopic                                                                 |
| Reproductive Organ | ICD-10 | 0UTM0ZZ | Resection of vulva, open approach                                                                                                 |
| Reproductive Organ | ICD-10 | 0UTMXZZ | Resection of vulva, external approach                                                                                             |
| Reproductive Organ | CPT    | 53410   | Urethroplasty - reconstruction of male anterior urethra                                                                           |
| Reproductive Organ | CPT    | 54520   | Excision procedures on the testis                                                                                                 |
| Reproductive Organ | CPT    | 54690   | Laparoscopic procedures on the testis                                                                                             |

|                    |        |         |                                                                                                                                                                           |
|--------------------|--------|---------|---------------------------------------------------------------------------------------------------------------------------------------------------------------------------|
| Reproductive Organ | CPT    | 54660   | Testicular implants                                                                                                                                                       |
| Reproductive Organ | CPT    | 54530   | Orchiectomy                                                                                                                                                               |
| Reproductive Organ | CPT    | 55180   | Scrotoplasty                                                                                                                                                              |
| Reproductive Organ | CPT    | 55175   | Scrotoplasty; simple                                                                                                                                                      |
| Reproductive Organ | CPT    | 54120   | Amputation of penis; partial                                                                                                                                              |
| Reproductive Organ | CPT    | 54125   | Penectomy                                                                                                                                                                 |
| Reproductive Organ | CPT    | 15757   | Phalloplasty (via free tissue/muscle/skin grafts)                                                                                                                         |
| Reproductive Organ | CPT    | 15734   | Phalloplasty (via free tissue/muscle/skin grafts)                                                                                                                         |
| Reproductive Organ | CPT    | 64856   | Neurorrhaphy (commonly medial and lateral antebrachial cutaneous nerve [radial forearm] to ileoinguinal and dorsal clitoral nerves)                                       |
| Reproductive Organ | CPT    | 54405   | Penile prosthesis (multi-component/hydraulic or semi-rigid)                                                                                                               |
| Reproductive Organ | CPT    | 54400   | Penile prosthesis (multi-component/hydraulic or semi-rigid)                                                                                                               |
| Reproductive Organ | ICD-10 | 0VBC0ZZ | Excision of Bilateral Testes, Open Approach                                                                                                                               |
| Reproductive Organ | ICD-10 | 0VB50ZZ | Excision of Scrotum, Open Approach                                                                                                                                        |
| Reproductive Organ | ICD-10 | 0VB53ZZ | Excision of Scrotum, Percutaneous Approach                                                                                                                                |
| Reproductive Organ | ICD-10 | 0VB54ZZ | Excision of Scrotum, Percutaneous Endoscopic Approach                                                                                                                     |
| Reproductive Organ | ICD-10 | 0VB5XZZ | Excision of Scrotum, External Approach                                                                                                                                    |
| Reproductive Organ | ICD-10 | 0VBS0ZZ | Excision of Penis, Open Approach                                                                                                                                          |
| Reproductive Organ | ICD-10 | 0VBSXZZ | Excision of Penis, External Approach                                                                                                                                      |
| Reproductive Organ | ICD-10 | 0VTS0ZZ | Resection of penis, open approach                                                                                                                                         |
| Reproductive Organ | ICD-10 | 0VTS4ZZ | Resection of penis, percutaneous endoscopic approach                                                                                                                      |
| Reproductive Organ | ICD-10 | 0VTSXZZ | Resection of penis, external approach                                                                                                                                     |
| Chest              | CPT    | 19300   | The provider excises the patient's breast to treat excessive enlargement of the male breast (gynecomastia).                                                               |
| Chest              | CPT    | 19303   | Mastectomy, simple, complete                                                                                                                                              |
| Chest              | CPT    | 19304   | Subcutaneous mastectomy with nipple preservation and no nipple transposition                                                                                              |
| Chest              | CPT    | 19318   | Breast reduction with pedicle or free nipple graft (in a free nipple graft procedure, a small de-epithelialized flap may be retained to provide contour to the subareola) |
| Chest              | CPT    | 19357   | Tissue expander placement in breast reconstruction, including subsequent expansion(s)                                                                                     |
| Chest              | CPT    | 19324   | Breast augmentation without prosthetic implant, e.g., fat grafting                                                                                                        |
| Chest              | CPT    | 19325   | Breast augmentation with prosthetic implant                                                                                                                               |
| Chest              | CPT    | 19316   | Mastopexy                                                                                                                                                                 |
| Chest              | CPT    | 19350   | Nipple/areola reconstruction                                                                                                                                              |
| Head               | CPT    | 31750   | Tracheoplasty; cervical                                                                                                                                                   |
| Head               | CPT    | 21125   | Augmentation, mandibular body or angle; prosthetic material                                                                                                               |
| Head               | CPT    | 21127   | Augmentation, mandibular body or angle; with bone graft, onlay or inter-positional (includes obtaining autograft)                                                         |
| Head               | CPT    | 21208   | Osteoplasty, facial bones; augmentation (autograft, allograft, or prosthetic implant)                                                                                     |
| Head               | CPT    | 21209   | Osteoplasty, facial bones; reduction                                                                                                                                      |
| Head               | CPT    | 30400   | Rhinoplasty, primary; lateral and alar cartilages and/or elevation of nasal tip                                                                                           |

|      |     |       |                                                                                                                                   |
|------|-----|-------|-----------------------------------------------------------------------------------------------------------------------------------|
| Head | CPT | 30410 | Rhinoplasty, primary; complete, external parts including bony pyramid, lateral and alar cartilages, and/or elevation of nasal tip |
| Head | CPT | 30420 | Rhinoplasty, primary; including major septal repair                                                                               |
| Head | CPT | 21120 | Genioplasty; augmentation (autograft, allograft, prosthetic material)                                                             |
| Head | CPT | 21121 | Genioplasty; sliding osteotomy, single piece                                                                                      |
| Head | CPT | 21122 | Genioplasty; sliding osteotomies, 2 or more osteotomies (e.g., wedge excision or bone wedge reversal for asymmetrical chin)       |
| Head | CPT | 21123 | Genioplasty; sliding, augmentation with inter-positional bone grafts (includes obtaining autografts)                              |
| Head | CPT | 15820 | Blepharoplasty, lower eyelid;                                                                                                     |
| Head | CPT | 15821 | Blepharoplasty, lower eyelid; with extensive herniated fat pad                                                                    |
| Head | CPT | 15822 | Blepharoplasty, upper eyelid;                                                                                                     |
| Head | CPT | 15823 | Blepharoplasty, upper eyelid; with excessive skin weighting down lid                                                              |
| Head | CPT | 15824 | Rhytidectomy; forehead                                                                                                            |
| Head | CPT | 15825 | Rhytidectomy; neck with platysmal tightening (platysmal flap, p-flap)                                                             |
| Head | CPT | 15826 | Rhytidectomy; glabellar frown lines                                                                                               |
| Head | CPT | 15828 | Rhytidectomy; cheek, chin, and neck                                                                                               |
| Head | CPT | 30430 | Rhinoplasty, secondary; minor revision (small amount of nasal tip work)                                                           |
| Head | CPT | 30435 | Rhinoplasty, secondary; intermediate revision (bony work with osteotomies)                                                        |
| Head | CPT | 30450 | Rhinoplasty, secondary; major revision (nasal tip work and osteotomies)                                                           |
| Head | CPT | 15829 | Rhytidectomy; superficial musculoaponeurotic system (smas) flap                                                                   |
| Head | CPT | 21137 | Reduction forehead; contouring only                                                                                               |
| Head | CPT | 21138 | Reduction forehead; contouring and application of prosthetic material or bone graft (includes obtaining autograft)                |
| Head | CPT | 21139 | Reduction forehead; contouring and setback of anterior frontal sinus wall                                                         |
| Head | CPT | 67900 | Repair of brow ptosis (supraciliary, mid-forehead or coronal approach)                                                            |
| Head | CPT | 21270 | Malar augmentation, prosthetic material                                                                                           |
| Head | CPT | 31599 | Unlisted procedure, larynx                                                                                                        |

Note: Procedural codes were compiled from gender-affirming surgery lists from Aetna, Blue Cross Blue Shield, and the Centers of Medicare and Medicaid services as well as a prior study.<sup>1-4</sup> Only procedure codes that alone can be considered gender-affirming were included in the list above and used to identify receipt gender-affirming surgery. For example, procedure codes for skin grafts or injection of filling material were not included in the list above.

**eTable 2:** TGD-related diagnoses

| Code  | Description               |
|-------|---------------------------|
| F64   | Gender identity disorders |
| F64.0 | Transsexualism            |
| F64.1 | Dual role transvestism    |

|         |                                       |
|---------|---------------------------------------|
| F64.2   | Gender identity disorder of childhood |
| F64.8   | Other gender identity disorders       |
| F64.9   | Gender identity disorder, unspecified |
| F65.1   | Transvestic fetishism                 |
| Z87.890 | Personal history of sex reassignment  |

Note: TGD-related diagnoses were defined from prior work and insurance coverage lists.<sup>1-3,5,6</sup>



**eTable 3:** Exclusionary diagnoses for ruling out gender-affirming surgery, by procedure type

| Procedure Type     | ICD-10 codes starting with | Description                                                                |
|--------------------|----------------------------|----------------------------------------------------------------------------|
| Reproductive Organ | C51                        | Malignant neoplasm of vulva                                                |
| Reproductive Organ | C52                        | Malignant neoplasm of vagina                                               |
| Reproductive Organ | C56                        | Malignant neoplasm of the ovary                                            |
| Reproductive Organ | C570                       | Malignant neoplasm of fallopian tube                                       |
| Reproductive Organ | C574                       | Malignant neoplasm of uterine adnexa, unspecified                          |
| Reproductive Organ | C577                       | Malignant neoplasm of other specified female genital organs                |
| Reproductive Organ | C578                       | Malignant neoplasm of overlapping sites of female genital organs           |
| Reproductive Organ | C579                       | Malignant neoplasm of female genital organ, unspecified                    |
| Reproductive Organ | C60                        | Malignant neoplasm of penis                                                |
| Reproductive Organ | C62                        | Malignant neoplasm of testis                                               |
| Reproductive Organ | C63                        | Malignant neoplasm of other and unspecified male genital organs            |
| Reproductive Organ | D06                        | Carcinoma in situ of cervix uteri                                          |
| Reproductive Organ | D176                       | Benign lipomatous neoplasm of spermatic cord                               |
| Reproductive Organ | D25                        | Leiomyoma of uterus                                                        |
| Reproductive Organ | D26                        | Other benign neoplasms of uterus                                           |
| Reproductive Organ | D27                        | Benign neoplasm of ovary                                                   |
| Reproductive Organ | D28                        | Benign neoplasm of other and unspecified female genital organs             |
| Reproductive Organ | D29                        | Benign neoplasm of male genital organs                                     |
| Reproductive Organ | D30                        | Benign neoplasm of urinary organs                                          |
| Reproductive Organ | D3616                      | Benign neoplasm of peripheral nerves and autonomic nervous system of pelvi |
| Reproductive Organ | D39                        | Neoplasm of uncertain or unknown behaviour of female genital organs        |
| Reproductive Organ | D495                       | Neoplasm of unspecified behavior of other genitourinary organs             |
| Reproductive Organ | E28                        | Ovarian dysfunction                                                        |
| Reproductive Organ | N27                        | Inflammatory disease of cervix uteri                                       |
| Reproductive Organ | N35                        | Urethral stricture                                                         |
| Reproductive Organ | N36                        | Other disorders of urethra                                                 |
| Reproductive Organ | N40                        | Benign prostatic hyperplasia                                               |
| Reproductive Organ | N41                        | Inflammatory disease of prostate                                           |
| Reproductive Organ | N42                        | Other and unspecified disorders of prostate                                |
| Reproductive Organ | N43                        | Hydrocele and spermatocele                                                 |
| Reproductive Organ | N44                        | Noninflammatory disorders of testis                                        |
| Reproductive Organ | N45                        | Orchitis and epididymitis                                                  |
| Reproductive Organ | N47                        | Disorders of prepuce                                                       |
| Reproductive Organ | N48                        | Other disorders of penis                                                   |
| Reproductive Organ | N49                        | Inflammatory disorders of male genital organs, not elsewhere classified    |

|                    |         |                                                                                              |
|--------------------|---------|----------------------------------------------------------------------------------------------|
| Reproductive Organ | N501    | Hematocele                                                                                   |
| Reproductive Organ | N503    | Cyst of epididymis                                                                           |
| Reproductive Organ | N70     | Salpingitis and oophoritis                                                                   |
| Reproductive Organ | N71     | Inflammatory disease of uterus, except cervix                                                |
| Reproductive Organ | N72     | Inflammatory disease of cervix uteri                                                         |
| Reproductive Organ | N73     | Other female pelvic inflammatory diseases                                                    |
| Reproductive Organ | N74     | Female pelvic inflammatory disorders in diseases classified elsewhere                        |
| Reproductive Organ | N75     | Diseases of Bartholin's gland                                                                |
| Reproductive Organ | N76     | Other inflammation of vagina and vulva                                                       |
| Reproductive Organ | N77     | Vulvovaginal ulceration and inflammation in diseases classified elsewhere                    |
| Reproductive Organ | N81     | Female genital prolapse                                                                      |
| Reproductive Organ | N82     | Fistulae involving female genital tract                                                      |
| Reproductive Organ | N83     | Noninflammatory disorders of ovary, fallopian tube and broad ligament                        |
| Reproductive Organ | N84     | Polyp of female genital tract                                                                |
| Reproductive Organ | N85     | Other noninflammatory disorders of uterus, except cervix                                     |
| Reproductive Organ | N87     | Dysplasia of cervix uteri                                                                    |
| Reproductive Organ | N88     | Other noninflammatory disorders of cervix uteri                                              |
| Reproductive Organ | N89     | Other noninflammatory disorders of vagina                                                    |
| Reproductive Organ | N90     | Other noninflammatory disorders of vulva and perineum                                        |
| Reproductive Organ | Q50     | Congenital malformations of ovaries, fallopian tubes and broad ligaments                     |
| Reproductive Organ | Q51     | Congenital malformations of uterus and cervix                                                |
| Reproductive Organ | Q52     | Other congenital malformations of female genitalia                                           |
| Reproductive Organ | Q53     | Undescended and ectopic testicle                                                             |
| Reproductive Organ | Q54     | Hypospadias                                                                                  |
| Reproductive Organ | Q55     | Other congenital malformations of male genital organs                                        |
| Reproductive Organ | Q64     | Other congenital malformations of urinary system                                             |
| Reproductive Organ | R1900   | Intra-abdominal and pelvic swelling, mass and lump                                           |
| Reproductive Organ | S3140XA | Unspecified open wound of vagina and vulva, initial encounter                                |
| Reproductive Organ | S31501A | Unspecified open wound of unspecified external genital organs, male, initial encounter       |
| Reproductive Organ | S358X1S | Laceration of other blood vessels at abdomen, lower back and pelvis level, initial encounter |
| Reproductive Organ | S3713XA | Laceration of ureter, initial encounter                                                      |
| Reproductive Organ | S3739XA | Other injury of urethra, initial encounter                                                   |
| Reproductive Organ | S3769XA | Other injury of uterus, initial encounter                                                    |
| Reproductive Organ | Z1502   | Genetic susceptibility to malignant neoplasm of ovary                                        |
| Reproductive Organ | Z1504   | Genetic susceptibility to malignant neoplasm of endometrium                                  |
| Reproductive Organ | Z4002   | Encounter for prophylactic removal of ovary                                                  |
| Reproductive Organ | Z4003   | Encounter for prophylactic removal of fallopian tube                                         |
| Reproductive Organ | Z804    | Family history of malignant neoplasm of genital organs                                       |

|                    |                                                                                                              |                                                                              |
|--------------------|--------------------------------------------------------------------------------------------------------------|------------------------------------------------------------------------------|
| Reproductive Organ | Z805                                                                                                         | Family history of malignant neoplasm of urinary tract                        |
| Reproductive Organ | Z854                                                                                                         | Personal history of malignant neoplasm of genital organs                     |
| Reproductive Organ | Z855                                                                                                         | Personal history of malignant neoplasm of urinary tract                      |
| Reproductive Organ | Z86001                                                                                                       | Personal history of in-situ neoplasm of cervix uteri                         |
| Reproductive Organ | Z86002                                                                                                       | Personal history of in-situ neoplasm of other and unspecified genital organs |
| Reproductive Organ | Z874                                                                                                         | Personal history of other diseases of the genitourinary system               |
| Chest              | N6482                                                                                                        | Hypoplasia                                                                   |
|                    | NOTE: Only exclude patients with this diagnosis if they underwent augmentation or reduction, not mastectomy. |                                                                              |
| Chest              | C50                                                                                                          | Malignant neoplasm of breast                                                 |
| Chest              | C761                                                                                                         | Malignant neoplasm of thorax                                                 |
| Chest              | C7951                                                                                                        | Secondary malignant neoplasm of bone                                         |
| Chest              | D05                                                                                                          | Carcinoma in situ of breast                                                  |
| Chest              | D24                                                                                                          | Benign neoplasm of breast                                                    |
| Chest              | D493                                                                                                         | Neoplasm of unspecified behavior of breast                                   |
| Chest              | N60                                                                                                          | Benign mammary dysplasia                                                     |
| Chest              | N61                                                                                                          | Inflammatory disorders of breast                                             |
| Chest              | N63                                                                                                          | Unspecified lump in breast                                                   |
| Chest              | N640                                                                                                         | Fissure and fistula of nipple                                                |
| Chest              | N641                                                                                                         | Fat necrosis of breast                                                       |
| Chest              | N643                                                                                                         | Galactorrhea not associated with childbirth                                  |
| Chest              | N6451                                                                                                        | Induration of breast                                                         |
| Chest              | Q83                                                                                                          | Congenital malformation of breast                                            |
| Chest              | R920                                                                                                         | Mammographic microcalcification found on diagnostic imaging of breast        |
| Chest              | S2100                                                                                                        | Unspecified open wound of breast                                             |
| Chest              | Z421                                                                                                         | Encounter for breast reconstruction following mastectomy                     |
| Chest              | Z803                                                                                                         | Family history of malignant neoplasm of breast                               |
| Chest              | Z853                                                                                                         | Personal history of malignant neoplasm of breast                             |
| Chest              | Z86000                                                                                                       | Personal history of in-situ neoplasm of breast                               |
| Head               | C08                                                                                                          | Malignant neoplasm of salivary ducts                                         |
| Head               | C760                                                                                                         | Malignant neoplasm of head, face and neck                                    |
| Head               | D106                                                                                                         | Benign neoplasm of nasopharynx                                               |
| Head               | D210                                                                                                         | Benign neoplasm of connective and other soft tissue of head, face and neck   |
| Head               | G4730                                                                                                        | Sleep apnea, unspecified                                                     |
| Head               | G4733                                                                                                        | Obstructive sleep apnea                                                      |

|      |        |                                                                                             |
|------|--------|---------------------------------------------------------------------------------------------|
| Head | J33    | Nasal polyp                                                                                 |
| Head | J342   | Deviated nasal septum                                                                       |
| Head | J343   | Hypertrophy of nasal turbinates                                                             |
| Head | J341   | Cyst and mucocele of nose and nasal sinus                                                   |
| Head | J3481  | Nasal mucositis (ulcerative)                                                                |
| Head | J352   | Hypertrophy of adenoids                                                                     |
| Head | M26609 | Temporomandibular joint disorders                                                           |
| Head | M950   | Acquired deformity of nose                                                                  |
| Head | Q315   | Congenital laryngomalacia                                                                   |
| Head | Q321   | Congenital malformations of trachea                                                         |
| Head | Z8521  | Personal history of malignant neoplasm of larynx                                            |
| Head | Z8522  | Personal history of malignant neoplasm of nasal cavities, middle ear, and accessory sinuses |
| Head | Z8581  | Personal history of malignant neoplasm of lip, oral cavity, and pharynx                     |
| Head | Z85850 | Personal history of malignant neoplasm of thyroid                                           |

**eTable 4:** Diagnoses indicating manually review of patient history is necessary to determine whether a surgery was definitively gender-affirming

| Procedure Type     | ICD-10 codes starting with | Description                                      |
|--------------------|----------------------------|--------------------------------------------------|
| Chest              | N6459                      | Other signs and symptoms in breast               |
| Chest              | N642                       | Atrophy of breast                                |
| Reproductive Organ | N508                       | Other specified disorders of male genital organs |

**eTable 5:** Intersex exclusionary diagnoses that rule out gender-affirming surgery

| Procedure Type | ICD-10 Codes starting with | Description                                                          |
|----------------|----------------------------|----------------------------------------------------------------------|
| Intersex       | Q991                       | True hermaphrodite                                                   |
| Intersex       | E25                        | Congenital adrenogenital disorders associated with enzyme deficiency |
| Intersex       | Q96-Q99                    | Pseudohermaphroditism w specified chromosomal anomaly                |
| Intersex       | E291                       | Testicular hypofunction                                              |
| Intersex       | Q891                       | Congenital malformations of adrenal gland                            |
| Intersex       | Q990                       | Chimera 46, XX/46, XY                                                |
| Intersex       | Q526                       | Congenital malformation of clitoris                                  |
| Intersex       | Q51818                     | Other congenital malformations of uterus                             |
| Intersex       | Q510                       | Agensis and aplasia of uterus                                        |

|          |                     |                                                                                |
|----------|---------------------|--------------------------------------------------------------------------------|
| Intersex | Q878                | Mayer-Rokitansky-Küster-Hauser syndrome type 2<br>Disease definition           |
| Intersex | E345                | Androgen insensitivity syndrome                                                |
| Intersex | Q532                | Undescended testicle, bilateral                                                |
| Intersex | Q542                | Hypospadias, penoscrotal                                                       |
| Intersex | Q543                | Hypospadias, perineal                                                          |
| Intersex | Q5500               | Absence and aplasia of testis                                                  |
| Intersex | Q5501               | Anorchia                                                                       |
| Intersex | Q561                | Male pseudohermaphroditism, not elsewhere classified                           |
| Intersex | Q973                | Female with 46,XY karyotype                                                    |
| Intersex | Q520                | Congenital absence of vagina                                                   |
| Intersex | Q521                | Doubling of vagina                                                             |
| Intersex | Q562                | Female pseudohermaphroditism, not elsewhere classified                         |
| Intersex | Q983                | Other male with 46,XX karyotype                                                |
| Intersex | E2500               | Salt-losing congenital adrenal hyperplasia                                     |
| Intersex | E2501               | Congenital adrenal hyperplasia                                                 |
| Intersex | Q960-Q969           | Turner syndrome and variants                                                   |
| Intersex | Q970-Q979           | Other sex chromosome abnormalities, female phenotype, not elsewhere classified |
| Intersex | Q980,Q981,Q982,Q984 | Klinefelter syndrome and variants                                              |
| Intersex | Q985-Q989           | Other sex chromosome abnormalities, male phenotype, not elsewhere classified   |
| Intersex | E259                | Adrenogenital disorder, unspecified                                            |
| Intersex | Q560                | Hermaphroditism, not elsewhere classified                                      |
| Intersex | Q563                | Pseudohermaphroditism, unspecified                                             |
| Intersex | Q564                | Indeterminate sex, unspecified                                                 |
| Intersex | Q530                | Ectopic testis                                                                 |
| Intersex | Q531                | Undescended testicle, unilateral                                               |
| Intersex | Q539                | Undescended testicle, unspecified                                              |
| Intersex | Q540                | Hypospadias, balanic                                                           |
| Intersex | Q541                | Hypospadias, penile                                                            |
| Intersex | Q544                | Congenital chordee                                                             |
| Intersex | Q548                | Other hypospadias                                                              |
| Intersex | Q549                | Hypospadias, unspecified                                                       |
| Intersex | Q551                | Hypoplasia of testis and scrotum                                               |
| Intersex | Q5520               | Retractile testis                                                              |
| Intersex | Q5528               | Unspecified congenital malformations of testis and scrotum                     |
| Intersex | Q556                | Other congenital malformations of penis                                        |
| Intersex | Q558                | Other specified congenital malformations of male genital organs                |
| Intersex | Q559                | Congenital malformation of male genital organ, unspecified                     |
| Intersex | Q522                | Congenital rectovaginal fistula                                                |

|          |      |                                                              |
|----------|------|--------------------------------------------------------------|
| Intersex | Q523 | Imperforate hymen                                            |
| Intersex | Q524 | Other congenital malformations of vagina                     |
| Intersex | Q525 | Fusion of labia                                              |
| Intersex | Q528 | Other specified congenital malformations of female genitalia |
| Intersex | Q529 | Congenital malformation of female genitalia, unspecified     |
| Intersex | Q641 | Exstrophy of urinary bladder                                 |
| Intersex | Q437 | Persistent cloaca                                            |
| Intersex | Q830 | Congenital absence of breast with absent nipple              |

**Note:** The diagnosis codes used to identify intersex people draw from previous work.<sup>10,11</sup>

## References

1. Hughto JMW, Hughes L, Yee K, et al. Improving Data-Driven Methods to Identify and Categorize Transgender Individuals by Gender in Insurance Claims Data. *LGBT Health*. May-Jun 2022;9(4):254-263. doi:10.1089/lgbt.2021.0433
2. Centers for Medicare & Medicaid Services. Billing and Coding: Gender Reassignment Services for Gender Dysphoria. Centers for Medicare & Medicaid Services,. Accessed June 29, 2023, 2023. <https://www.cms.gov/medicare-coverage-database/view/article.aspx?articleid=53793&ver=25&=>
3. Blue Cross Blue Shield of Massachusetts. *Gender Affirming Services (Transgender and Gender Diverse Services)*. Vol. 189. 2023. <https://www.bluecrossma.org/medical-policies/sites/g/files/cspkws2091/files/acquiadam-assets/189%20Gender%20Affirming%20Services%20%28Transgender%20Services%29%20prn.pdf>
4. Aetna. Gender Affirming Surgery. Aetna. Updated August 8, 2023. Accessed June 1, 2023, 2023. [https://www.aetna.com/cpb/medical/data/600\\_699/0615.html#dummyLink1](https://www.aetna.com/cpb/medical/data/600_699/0615.html#dummyLink1)
5. Blosnich JR, Cashy J, Gordon AJ, et al. Using clinician text notes in electronic medical record data to validate transgender-related diagnosis codes. *J Am Med Inform Assoc*. Jul 1 2018;25(7):905-908. doi:10.1093/jamia/ocy022
6. Ewald ER, Guerino P, Dragon C, Laffan AM, Goldstein Z, Streed C, Jr. Identifying Medicare Beneficiaries Accessing Transgender-Related Care in the Era of ICD-10. *LGBT Health*. May/Jun 2019;6(4):166-173. doi:10.1089/lgbt.2018.0175
7. Coleman E, Radix AE, Bouman WP, et al. Standards of care for the health of transgender and gender diverse people, Version 8. *Int J Transgend Health*. 2022;23(Suppl 1):S1-s259. doi:10.1080/26895269.2022.2100644
8. Tracking the rise of anti-trans bills in the U.S. Trans Legislation Tracker. June 14, 2023, Accessed June 14, 2023, 2023. <https://translegislation.com/learn>
9. Carpenter M. The human rights of intersex people: addressing harmful practices and rhetoric of change. *Reprod Health Matters*. May 2016;24(47):74-84. doi:10.1016/j.rhm.2016.06.003
10. Kohva E, Miettinen PJ, Taskinen S, Hero M, Tarkkanen A, Raivio T. Disorders of sex development: timing of diagnosis and management in a single large tertiary center. *Endocr Connect*. Apr 2018;7(4):595-603. doi:10.1530/ec-18-0070
11. Global Action for Trans Equality. *Submission by GATE to the World Health Organization: Intersex codes in the International Classification of Diseases (ICD) 11 Beta Draft*. 2017. June, 2017. Accessed June 1, 2023. <https://morgancarpenter.com/consulting/>
