# Supplementary material for: Prevalence of Gender-Affirming Surgical Procedures Among Minors and Adults in the US
Source: PubMed Central journal article supplement (PMC11211955; doi:10.1001/jamanetworkopen.2024.18814), 2024-06-27
Supplement: jamanetwopen-e2418814-s002.pdf [file jamanetwopen-e2418814-s002.pdf]

## **Data Sharing Statement**

### **Data**

**Data available:** No

### **Additional Information**

**Explanation for why data not available:** Our data use agreement would not allow for this.
